# Supplementary material for: Genomic Patterns of Positive Selection at the Origin of Rust Fungi
Source: PLoS One. 2015 Dec 3;10(12):e0143959. doi: 10.1371/journal.pone.0143959 (PMC4669144; doi:10.1371/journal.pone.0143959)
Supplement: S1 Table — Detailed information on the genomic and EST data used on the present study for each species with the taxonomic rank, total number and length of protein sequences, link to genome database and corresponding citation. (XLS) [file pone.0143959.s002.xls]

## Sheet: Sheet1
Supplementary table 1	Details on the genomic and EST data used on the present study
Species	Data type	Taxonomy				Dataset
		Phylum	Subphylum	Class	Order	Protein number	Total length	Average gene length	Link	Citation
Agaricus bisporus	Genome	Basidiomycota	Agaricomycotina	Agaricomycetes	Agaricales	10438	4514068	432.51	http://genome.jgi.doe.gov/Agabi_varbisH97_2/Agabi_varbisH97_2.download.html	Morin et al. 2012
Auricularia delicata	Genome	Basidiomycota	Agaricomycotina	Agaricomycetes	Auriculariales	23577	9238049	391.84	http://genome.jgi.doe.gov/Aurde1/Aurde1.home.html	Floudas et al. 2012
Bjerkandera adusta	Genome	Basidiomycota	Agaricomycotina	Agaricomycetes	Polyporales	15473	6379989	412.36	http://genome.jgi.doe.gov/Bjead1_1/Bjead1_1.home.html	Binder et al. 2014
Ceriporiopsis subvermispora	Genome	Basidiomycota	Agaricomycotina	Agaricomycetes	Polyporales	12125	5249589	432.99	http://genome.jgi-psf.org/Cersu1/Cersu1.home.html	Fernandez-Fueyo et al. 2012
Coniophora puteana	Genome	Basidiomycota	Agaricomycotina	Agaricomycetes	Boletales	13761	6116895	444.54	http://genome.jgi-psf.org/Conpu1/Conpu1.home.html	Floudas et al. 2012
Coprinopsis cinerea	Genome	Basidiomycota	Agaricomycotina	Agaricomycetes	Agaricales	13342	6283763	471.01	http://www.broadinstitute.org/annotation/genome/coprinus_cinereus/MultiHome.html;jsessionid=415C769741CCD4F4FAC3D0A3EBA2F553.route980	Coprinopsis cinerea Sequencing Project, Broad Institute of Harvard and MIT (http://www.broadinstitute.org/)
Cryptococcus gattii	Genome	Basidiomycota	Agaricomycotina	Tremellomycetes	Tremellales	6210	3254637	524.18	http://www.broadinstitute.org/annotation/genome/cryptococcus_neoformans_b/MultiHome.html	Cryptococcus gattii Sequencing Project, Broad Institute of Harvard and MIT (http://www.broadinstitute.org/)
Cryptococcus neoformans	Genome	Basidiomycota	Agaricomycotina	Tremellomycetes	Tremellales	6967	3637167	522.13	http://www.broadinstitute.org/annotation/genome/cryptococcus_neoformans/MultiHome.html	Cryptococcus neoformans var. grubii H99 Sequencing Project, Broad Institute of Harvard and MIT (http://www.broadinstitute.org/)
Dacryopinax sp.	Genome	Basidiomycota	Agaricomycotina	Dacrymycetes	Dacrymycetales	10242	4210446	411.14	http://genome.jgi-psf.org/Dacsp1/Dacsp1.home.html	Floudas et al. 2012
Dichomitus squalens	Genome	Basidiomycota	Agaricomycotina	Agaricomycetes	Polyporales	12290	5225671	425.23	http://genome.jgi.doe.gov/Dicsq1/Dicsq1.home.html	Floudas et al. 2012
Fomitiporia mediterranea	Genome	Basidiomycota	Agaricomycotina	Agaricomycetes	Hymenochaetales	11333	4919745	434.15	http://genome.jgi.doe.gov/Fomme1/Fomme1.home.html	Floudas et al. 2012
Fomitopsis pinicola	Genome	Basidiomycota	Agaricomycotina	Agaricomycetes	Polyporales	14724	5919823	402.08	http://genome.jgi-psf.org/Fompi3/Fompi3.home.html	Floudas et al. 2012
Ganoderma sp.	Genome	Basidiomycota	Agaricomycotina	Agaricomycetes	Polyporales	12910	5599385	433.76	http://genome.jgi-psf.org/Gansp1/Gansp1.home.html	Binder et al. 2014
Gloeophyllum trabeum	Genome	Basidiomycota	Agaricomycotina	Agaricomycetes	Gloeophyllaceae	11846	5059364	427.13	http://genome.jgi.doe.gov/Glotr1_1/Glotr1_1.home.html	Floudas et al. 2012
Heterobasidion annosum	Genome	Basidiomycota	Agaricomycotina	Agaricomycetes	Russulales	13405	5154689	384.56	http://genome.jgi-psf.org/Hetan2/Hetan2.home.html	Olson et al. 2012
Laccaria bicolor	Genome	Basidiomycota	Agaricomycotina	Agaricomycetes	Agaricales	23132	8353592	361.14	http://genome.jgi-psf.org/Lacbi2/Lacbi2.home.html	Martin et al. 2008 (http://www.ncbi.nlm.nih.gov/pubmed/18322534)
Melampsora laricis-populina	Genome	Basidiomycota	Pucciniomycotina	Pucciniomycetes	Pucciniales	16694	6410403	384.02	http://genome.jgi.doe.gov/Mellp1/Mellp1.home.html	Duplessis et al. 2011
Paxillus involutus	Genome	Basidiomycota	Agaricomycotina	Agaricomycetes	Boletales	17968	6494473	361.47	http://genome.jgi-psf.org/Paxin1/Paxin1.home.html	Unpublished sequence data, produced by the US Department of Energy Joint Genome Institute http://www.jgi.doe.gov/
Phanerochaete carnosa	Genome	Basidiomycota	Agaricomycotina	Agaricomycetes	Polyporales	13937	5428644	389.54	http://genome.jgi.doe.gov/Phaca1/Phaca1.home.html	Suzuki et al. 2012
Phanerochaete chrysosporium	Genome	Basidiomycota	Agaricomycotina	Agaricomycetes	Polyporales	10048	4643668	462.19	http://genome.jgi-psf.org/Phchr1/Phchr1.home.html	Martinez et al. 2004
Phlebia brevispora	Genome	Basidiomycota	Agaricomycotina	Agaricomycetes	Polyporales	16170	6567691	406.19	http://genome.jgi-psf.org/Phlbr1/Phlbr1.home.html	Binder et al. 2014
Phlebiopsis gigantea	Genome	Basidiomycota	Agaricomycotina	Agaricomycetes	Polyporales	11891	4964705	417.55	http://genome.jgi-psf.org/Phlgi1/Phlgi1.home.html	Unpublished sequence data, produced by the US Department of Energy Joint Genome Institute http://www.jgi.doe.gov/
Pleurotus ostreatus	Genome	Basidiomycota	Agaricomycotina	Agaricomycetes	Agaricales	12330	5226749	423.94	http://genome.jgi-psf.org/PleosPC15_2/PleosPC15_2.home.html	Unpublished sequence data, produced by the US Department of Energy Joint Genome Institute http://www.jgi.doe.gov/
Postia placenta	Genome	Basidiomycota	Agaricomycotina	Agaricomycetes	Polyporales	9113	4000497	439.04	http://genome.jgi-psf.org/Pospl1/Pospl1.home.html	Martinez et al. 2009
Puccinia graminis f. sp. Tritici	Genome	Basidiomycota	Pucciniomycotina	Pucciniomycetes	Pucciniales	15979	6437350	402.89	http://genome.jgi-psf.org/Pucgr1/Pucgr1.home.html	Puccinia Group Sequencing Project, Broad Institute of Harvard and MIT (http://www.broadinstitute.org/)
Puccinia triticina	Genome	Basidiomycota	Pucciniomycotina	Pucciniomycetes	Pucciniales	11630	4745807	408.1	http://www.broadinstitute.org/annotation/genome/puccinia_group/MultiHome.html	Puccinia Group Sequencing Project, Broad Institute of Harvard and MIT. Unpublished data (http://www.broadinstitute.org/)
Punctularia strigosozonata	Genome	Basidiomycota	Agaricomycotina	Agaricomycetes	Corticiales	11538	5154085	446.74	http://genome.jgi-psf.org/Punst1/Punst1.home.html	Floudas et al. 2012
Schizophyllum commune	Genome	Basidiomycota	Agaricomycotina	Agaricomycetes	Agaricales	14652	6550036	447.07	http://genome.jgi-psf.org/Schco2/Schco2.home.html	Ohm et al. 2009
Serpula lacrymans	Genome	Basidiomycota	Agaricomycotina	Agaricomycetes	Boletales	14495	4744658	327.35	http://genome.jgi-psf.org/SerlaS7_3_2/SerlaS7_3_2.home.html	Eastwood et al. 2011
Serpula lacrymans S7.9	Genome	Basidiomycota	Agaricomycotina	Agaricomycetes	Boletales	16257	5179401	318.61	http://genome.jgi.doe.gov/SerlaS7_9_2/SerlaS7_9_2.home.html	Eastwood et al. 2011
Sporobolomyces roseus	Genome	Basidiomycota	Pucciniomycotina	Microbotryomycetes	Sporidiobolales	5536	3173802	573.41	http://genome.jgi-psf.org/Sporo1/Sporo1.home.html	Unpublished sequence data, produced by the US Department of Energy Joint Genome Institute http://www.jgi.doe.gov/
Stereum hirsutum	Genome	Basidiomycota	Agaricomycotina	Agaricomycetes	Russulales	14072	6537368	464.6	http://genome.jgi-psf.org/Stehi1/Stehi1.home.html	Floudas et al. 2012
Trametes versicolor	Genome	Basidiomycota	Agaricomycotina	Agaricomycetes	Polyporales	14296	6122306	428.28	genome.jgi-psf.org/Trave1/Trave1.home.html	Floudas et al. 2012
Tremella mesenterica	Genome	Basidiomycota	Agaricomycotina	Tremellomycetes	Tremellales	8313	3929320	472.73	http://genome.jgi-psf.org/Treme1/Treme1.home.html	Morin et al. 2012
Ustilago maydis	Genome	Basidiomycota	Ustilaginomycotina	Ustilaginomycetes	Ustilaginales	6522	4069824	624.11	http://www.broadinstitute.org/annotation/genome/ustilago_maydis/	Ustilago maydis Sequencing Project. Broad Institute of MIT and Harvard (http://www.broad.mit.edu)
Wallemia sebi	Genome	Basidiomycota	incertae sedis	Wallemiomycetes	Wallemiales	5284	2268239	429.35	http://genome.jgi.doe.gov/Walse1/Walse1.home.html	Padamsee et al. 2012
Wolfiporia cocos	Genome	Basidiomycota	Agaricomycotina	Agaricomycetes	Polyporales	12746	5290821	415.13	http://genome.jgi-psf.org/Wolco1/Wolco1.home.html	Floudas et al. 2012
Armillaria tabescens	EST	Basidiomycota	Agaricomycotina	Agaricomycetes	Agaricales	57	2126	37.2982
Cryptococcus laurentii	EST	Basidiomycota	Agaricomycotina	Tremellomycetes	Tremellales	1200	49383	41.1525
Fomitopsis palustris	EST	Basidiomycota	Agaricomycotina	Agaricomycetes	Polyporales	535	33072	61.8168
Ganoderma lucidum	EST	Basidiomycota	Agaricomycotina	Agaricomycetes	Polyporales	2517	160874	63.915
Hemileia vastatrix	EST	Basidiomycota	Pucciniomycotina	Pucciniomycetes	Pucciniales	1311	332994	254.58
Lentinula edodes	EST	Basidiomycota	Agaricomycotina	Agaricomycetes	Agaricales	1970	97881	49.6858
Leucosporidium scottii	EST	Basidiomycota	Pucciniomycotina	Microbotryomycetes	Leucosporidiales	1311	73103	55.7613
Melampsora medusae f. sp. deltoidis	EST	Basidiomycota	Pucciniomycotina	Pucciniomycetes	Pucciniales	275	13265	48.2364
Melampsora medusae f. sp. tremuloidis	EST	Basidiomycota	Pucciniomycotina	Pucciniomycetes	Pucciniales	317	11769	37.1262
Melampsora occidentalis	EST	Basidiomycota	Pucciniomycotina	Pucciniomycetes	Pucciniales	452	21870	48.385
Microbotryum violaceum	EST	Basidiomycota	Pucciniomycotina	Microbotryomycetes	Microbotryales	1916	91847	47.9368
Moniliophthora perniciosa	EST	Basidiomycota	Agaricomycotina	Agaricomycetes	Agaricales	471	21725	46.1253
Phakopsora pachyrhizi	EST	Basidiomycota	Pucciniomycotina	Pucciniomycetes	Pucciniales	1239	174528	140.862
Phellinidium sulphurascens	EST	Basidiomycota	Agaricomycotina	Agaricomycetes	Hymenochaetales	413	23148	56.0484
Pisolithus microcarpus	EST	Basidiomycota	Agaricomycotina	Agaricomycetes	Boletales	214	10046	46.9439
Pisolithus tinctorius	EST	Basidiomycota	Agaricomycotina	Agaricomycetes	Boletales	161	7958	49.4286
Puccinia striiformis f. sp. tritici	EST	Basidiomycota	Pucciniomycotina	Pucciniomycetes	Pucciniales	324	15405	47.5463
Suillus luteus	EST	Basidiomycota	Agaricomycotina	Agaricomycetes	Boletales	149	3954	26.5369
Taiwanofungus camphoratus	EST	Basidiomycota	Agaricomycotina	Agaricomycetes	Polyporales	1608	76415	47.5218
Uromyces appendiculatus	EST	Basidiomycota	Pucciniomycotina	Pucciniomycetes	Pucciniales	1033	46671	45.1801
Uromyces viciae-fabae	EST	Basidiomycota	Pucciniomycotina	Pucciniomycetes	Pucciniales	173	6420	37.1098
Outgroup
Saitoella complicata	Genome	Ascomycota	Taphrinomycotina	incertae sedis	incertae sedis	7034	3023387	429.89
Yarrowia lipolytica	Genome	Ascomycota	Saccharomycotina	Saccharomycetes	Saccharomycetales	6448	3194468	495.5
Lipomyces starkeyi	Genome	Ascomycota	Saccharomycotina	Saccharomycetes	Saccharomycetales	9493	3498639	368.59
Mycosphaerella fijiensis	Genome	Ascomycota	Pezizomycotina	Dothideomycetes	Capnodiales	13107	5688215	434.02
Cochliobolus heterostrophus	Genome	Ascomycota	Pezizomycotina	Dothideomycetes	Pleosporales	13336	5795028	434.57
Botrytis cinerea	Genome	Ascomycota	Pezizomycotina	Leotiomycetes	Helotiales	16448	5611312	341.18
Colletotrichum higginsianum	Genome	Ascomycota	Pezizomycotina	Sordariomycetes	Glomerellales	16150	6001965	371.66
Nectria haematococca	Genome	Ascomycota	Pezizomycotina	Sordariomycetes	Hypocreales	15707	7661162	487.79
Aspergillus carbonarius	Genome	Ascomycota	Pezizomycotina	Eurotiomycetes	Eurotiales	11624	5431323	467.29
Reference list:
Morin E, Kohler A, Baker AR, Foulongne-Oriol M, Lombard V, Nagy LG, Ohm RA, Patyshakuliyeva A, Brun A, Aerts AL, Bailey AM, Billette C, Coutinho PM, Deakin G, Doddapaneni H, Floudas D, Grimwood J, Hildén K, Kües U, Labutti KM, Lapidus A, Lindquist EA, Lucas SM, Murat C, Riley RW, Salamov AA, Schmutz J, Subramanian V, Wösten HA, Xu J, Eastwood DC, Foster GD, Sonnenberg AS, Cullen D, de Vries RP, L…
Floudas D, Binder M, Riley R, Barry K, Blanchette RA, Henrissat B, Martínez AT, Ortillar R, Spatafora JW, Yadav JS, Aerts A, Benoit I, Boyd A, Carlson A, Copeland A, Coutinho PM, de Vries RP, Ferreira P, Findley K, Foster B, Gaskell J, Glotzer D, Górecki P, Heitman J, Hesse C, Hori C, Igarashi K, Jurgens JA, Kallen N, Kersten P, Khajamohiddin A, Kohler A, Kues U, Kumar TKA, Kuo A, LaButti K, Larr…
Binder M, Justo A, Riley R, Salamov A, López-Giráldez F, Sjökvist E, Copeland A, Foster B, Sun H, Larsson E, Larsson KH, Townsend J, Grigoriev IV, Hibbett DS. Phylogenetic and Phylogenomic overview of the Polyporales. Mycologia. 2013 Aug 11.
Fernandez-Fueyo E, Ruiz-Dueñas FJ, Ferreira P, Floudas D, Hibbett DS, Canessa P, Larrondo LF, James TY, Seelenfreund D, Lobos S, Polanco R, Tello M, Honda Y, Watanabe T, Watanabe T, San RJ, Kubicek CP, Schmoll M, Gaskell J, Hammel KE, St John FJ, Vanden Wymelenberg A, Sabat G, Splinter Bondurant S, Syed K, Yadav JS, Doddapaneni H, Subramanian V, Lavín JL, Oguiza JA, Perez G, Pisabarro AG, Ramirez…
Olson A, Aerts A, Asiegbu F, Belbahri L, Bouzid O, Broberg A, Canbäck B, Coutinho PM, Cullen D, Dalman K, Deflorio G, van Diepen LT, Dunand C, Duplessis S, Durling M, Gonthier P, Grimwood J, Fossdal CG, Hansson D, Henrissat B, Hietala A, Himmelstrand K, Hoffmeister D, Högberg N, James TY, Karlsson M, Kohler A, Kües U, Lee YH, Lin YC, Lind M, Lindquist E, Lombard V, Lucas S, Lundén K, Morin E, Mur…
Duplessis S, Cuomo C, Lin Y-C, Aerts A, Tisserant E, Veneault-Fourrey C, Joly D, Hacquard S, Amselem J, Cantarel B, Readman C, Coutinho P, Feau N, Field M, Frey P, Gelhaye E, Goldberg J, Grabherr M, Kodira C, Kohler A, Kues U, Lindquist E, Lucas S, Mago R, Mauceli E, Morin E, Murat C, Pangilinan J, Park R, Pearson M, Quesneville H, Rouhier N, Sakthikumar S, Salamov A, Schmutz J, Selles B, Shapiro…
Suzuki H, Macdonald J, Syed K, Salamov A, Hori C, Aerts A, Henrissat B, Wiebenga A, Vankuyk PA, Barry K, Lindquist E, Labutti K, Lapidus A, Lucas S, Coutinho P, Gong Y, Samejima M, Mahadevan R, Abou-Zaid M, de Vries RP, Igarashi K, Yadav JS, Grigoriev IV, Master ER. (2012) Comparative genomics of the white-rot fungi, Phanerochaete carnosa and P. chrysosporium, to elucidate the genetic basis of th…
Martinez D, Larrondo LF, Putnam N, Gelpke MD, Huang K, Chapman J, Helfenbein KG, Ramaiya P, Detter JC, Larimer F, Coutinho PM, Henrissat B, Berka R, Cullen D, Rokhsar D. (2004) Genome sequence of the lignocellulose degrading fungus Phanerochaete chrysosporium strain RP78. Nature Biotechnology 22, 695 – 700
Martinez D, Challacombe J, Morgenstern I, Hibbett D, Schmoll M, Kubicek CP, Ferreira P, Ruiz-Duenas FJ, Martinez AT, Kersten P, Hammel KE, Vanden Wymelenberg A, Gaskell J, Lindquist E, Sabat G, Bondurant SS, Larrondo LF, Canessa P, Vicuna R, Yadav J, Doddapaneni H, Subramanian V, Pisabarro AG, Lavin JL, Oguiza JA, Master E, Henrissat B, Coutinho PM, Harris P, Magnuson JK, Baker SE, Bruno K, Kenea…
Ohm RA, Jong JF, Lugones LG, Aerts A, Kothe E, Stajich JE, de Vries RP, Record E, Levasseur A, Baker SE, Bartholomew KA, Coutinho PM, Erdmann S, Fowler TJ, Gathman AC, Lombard V, Henrissat B, Knabe N, Kües U, Lilly WW, Lindquist E, Lucas S, Magnuson JK, Piumi F, Raudaskoski M, Salamov A, Schmutz J, Schwarze FWMR, vanKuyk PA, Horton JS, Grigoriev IV, Wösten HAB Genome sequence of the model mushroo…
Eastwood DC, Floudas D, Binder M, Majcherczyk A, Schneider P, Aerts A, Asiegbu FO, Baker SE, Barry K, Bendiksby M, Blumentritt M, Coutinho PM, Cullen D, de Vries RP, Gathman A, Goodell B, Henrissat B, Ihrmark K, Kauserud H, Kohler A, LaButti K, Lapidus A, Lavin JL, Lee YH, Lindquist E, Lilly W, Lucas S, Morin E, Murat C, Oguiza JA, Park J, Pisabarro AG, Riley R, Rosling A, Salamov A, Schmidt O, S…
Padamsee M, Arun Kumar TK, Riley R, Binder M, Boyd A, Calvo AM, Furukawa K, Hesse C, Hohmann S, James TY, Labutti K, Lapidus A, Lindquist E, Lucas S, Miller K, Shantappa S, Grigoriev IV, Hibbett DS, McLaughlin DJ, Spatafora JW, Aime CM. (2012) The genome of the xerotolerant mold Wallemia sebireveals adaptations to osmotic stress and suggests cryptic sexual reproduction. Fungal Genet Biol. 49(3):2…
